# Supplementary material
Source: PubMed Central journal article supplement (PMC3657831)
Supplement: 1306263110_pnas.201306263SI.pdf [file 1306263110_pnas.201306263SI.pdf]

# Supporting Information

Xie et al. 10.1073/pnas.1306263110

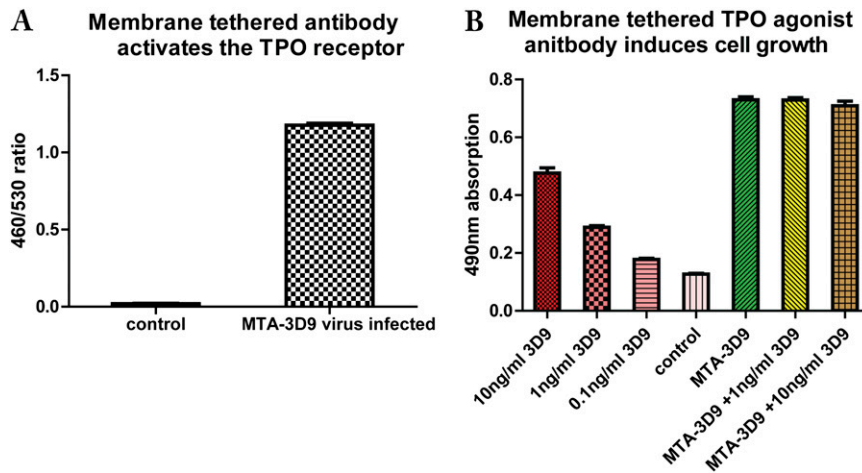

**Fig. S1.** Membrane-tethered thrombopoietin receptor (TPOR) agonist antibody (MTA-3D9) stimulates both reporter cell lines. (A) A TPOR lactamase reporter cell line is activated after infection by Lentivirus expressing the TPO agonist antibody (MTA-3D9). (B) A growth-based analysis. The Ba/F3-TPOR reporter cell line proliferates after infection by Lentivirus expressing antibody MTA-3D9. Cell growth was measured 2 d after virus infection and compared with treatment with the control TPO agonist antibody using a standard MTS [3-(4,5-dimethylthiazol-2-yl)-5-(3-carboxymethoxyphenyl)-2-(4-sulfophenyl)-2H-tetrazolium] assay. Each treatment was studied in triplicate. Cell growth was maximal after MTA-3D9 infection and addition of extra soluble agonist antibody had no effect.

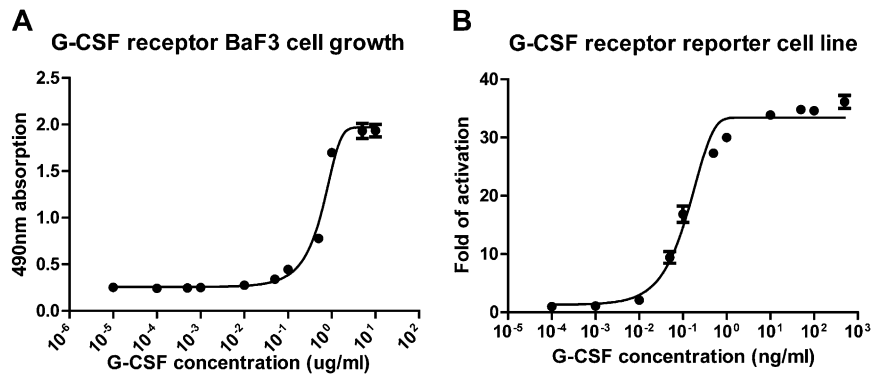

**Fig. S2.** Establishment of the granulocyte colony-stimulating factor (G-CSF) reporter cell lines. (A) The Ba/F3-G-CSF receptor (G-CSFR) reporter cell line responds by growth to G-CSF treatment in a dose dependent manner. The cell growth is determined by a standard MTS assay. (B) The  $\beta$ -lactamase based G-CSF reporter cell line (SIE/BLA/SIG) responds to different doses of G-CSF treatment. After G-CSF induction,  $\beta$ -lactamase activity is measured by a FRET signal generated by hydrolysis of the CCF4-AM substrate within the cells.

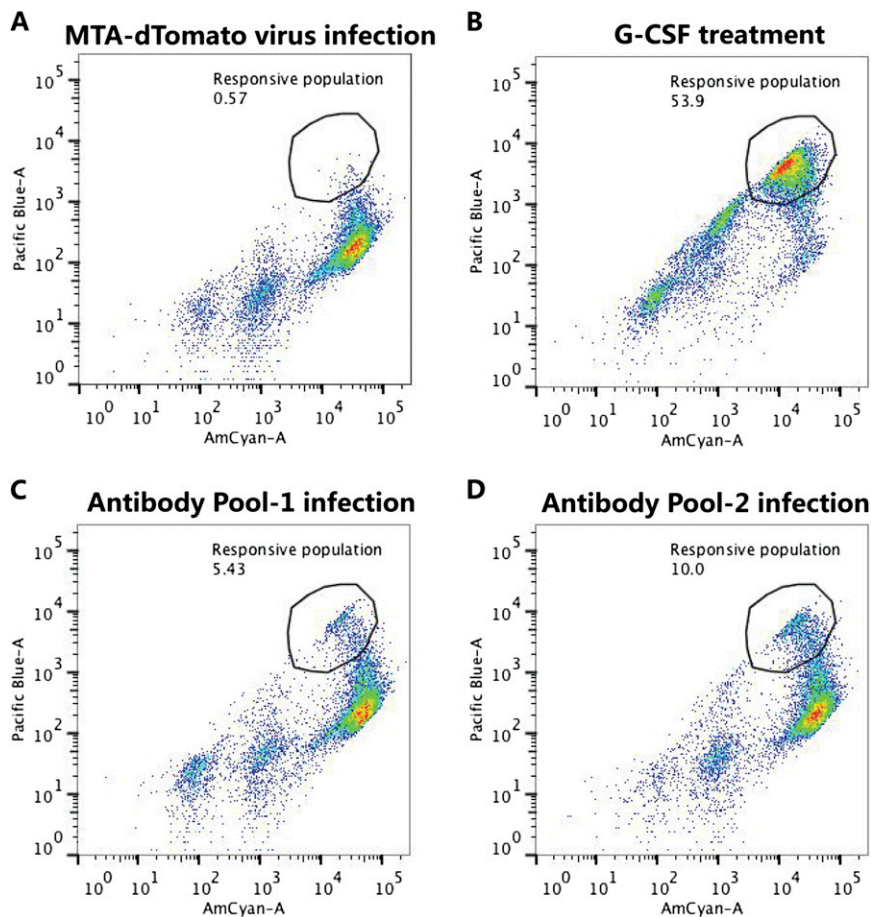

**Fig. S3.** The preselected plasma membrane tethered antibody libraries activate the reporter cell line. (A) As a control, SIE/BLA/SIG cells were infected by lentiviruses expressing membrane tethered Tomato red fluorescence protein (MTA-Tomato) followed by incubation with the FRET substrate (CCF4-AM). These control cells showed little activation. (B) Treatment with 1 ng/mL G-CSF activates the majority of the cells. (C) The reporter cells were infected by the lentivirus antibody library that had been enriched by panning against the G-CSFR ectodomain. (D) The activated pool of cells from C was collected and the antibody genes were recovered. The genes were converted into a secondary MTA-antibody lentivirus library, and the reporter cells were infected again. In this second round a larger percentage of cells was induced. The same gate was applied to the four panels. The induced cells are indicated by a circle to underscore the differences between various treatments.

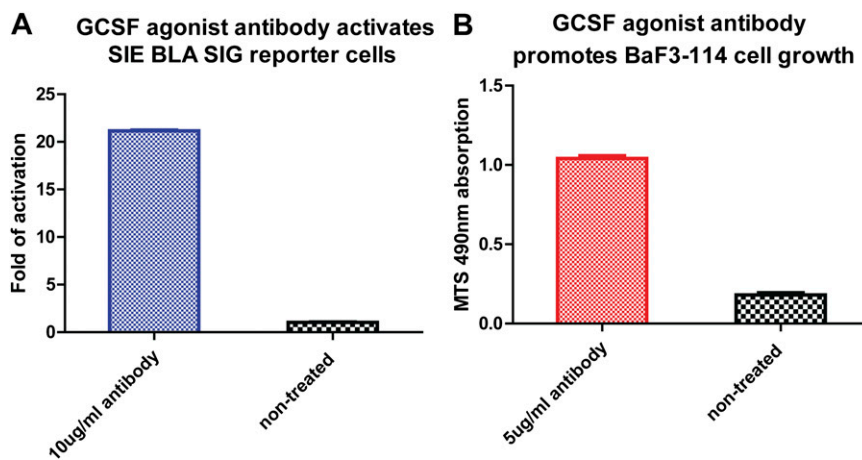

**Fig. S4.** The isolated soluble G-CSFR agonist antibody is capable of activating reporter cell lines. (A) The SIE/BLA/SIG cells were activated after the agonist antibody treatment.  $\beta$ -lactamase activity is measured by the FRET signal from hydrolysis of the CCF4-AM substrate. (B) The growth of the BaF3-G-CSFR cell line (BaF3-114) is stimulated by 2 d of treatment with the agonist antibody as measured by the MTS assay.

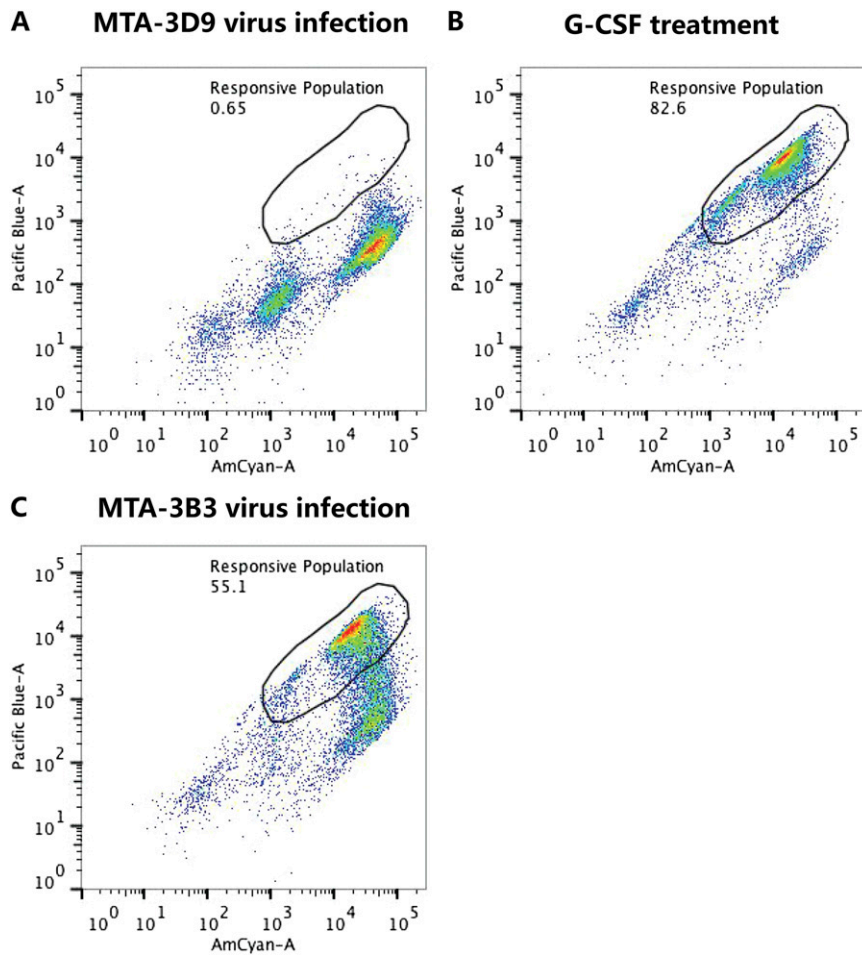

**Fig. S5.** The membrane tethered agonist antibody activated the G-CSFR reporter cells. (A) As a control, it was shown that the membrane tethered TPOR agonist antibody (MTA-3D9) does not activate the G-CSFR reporter cells. (B) G-CSF (1 ng/mL) treatment potently activates the reporter cells. (C) Lentivirus mediated delivery of the membrane-tethered agonist antibody activates the SIE/BLA/SIG cells.

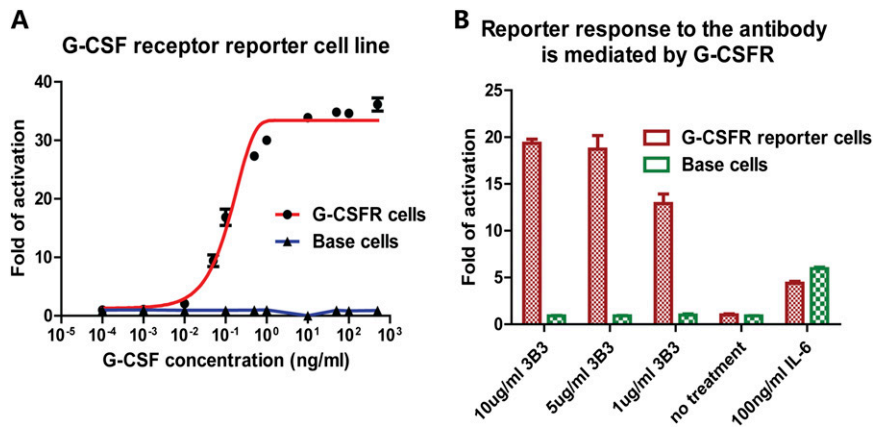

**Fig. S6.** The response of the SIE/BLA/SIG cells are strictly receptor dependent. (A) G-CSF activates the reporter cell line in a dose-dependent manner (round dots/red fitted curve), whereas the base cells (SIE/BLA cells used for constructing the reporter cell line) that did not contain the G-CSFR did not respond to any dose of G-CSF (triangles/blue fitted curve). (B) The reporter cell line responds to the agonist antibody (3B3) in a dose dependent manner (red column), whereas the base cells have no response to any dose of 3B3 (green column). Both cell lines respond to treatment with IL-6.

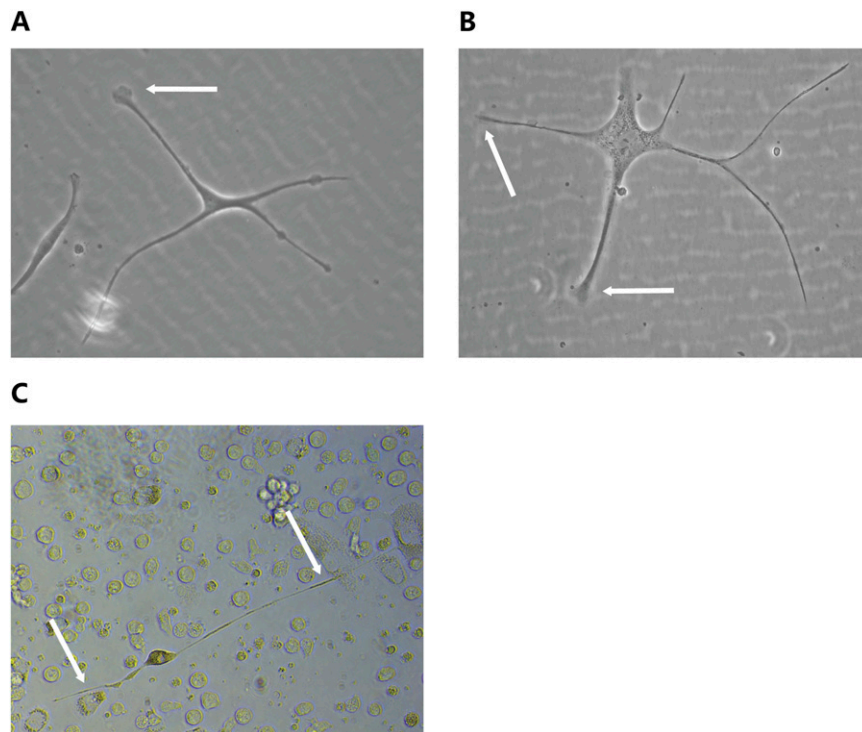

**Fig. 57.** Typical morphology of the antibody induced cells. (A and B) Single cells that are attached to glass coverslips after 2 wk of treatment with the G-SCF agonist antibody. White arrows point to growth cones. (C) "Bi-polar" morphology of some cells after 10 d in culture. Arrows indicate long neuritis.

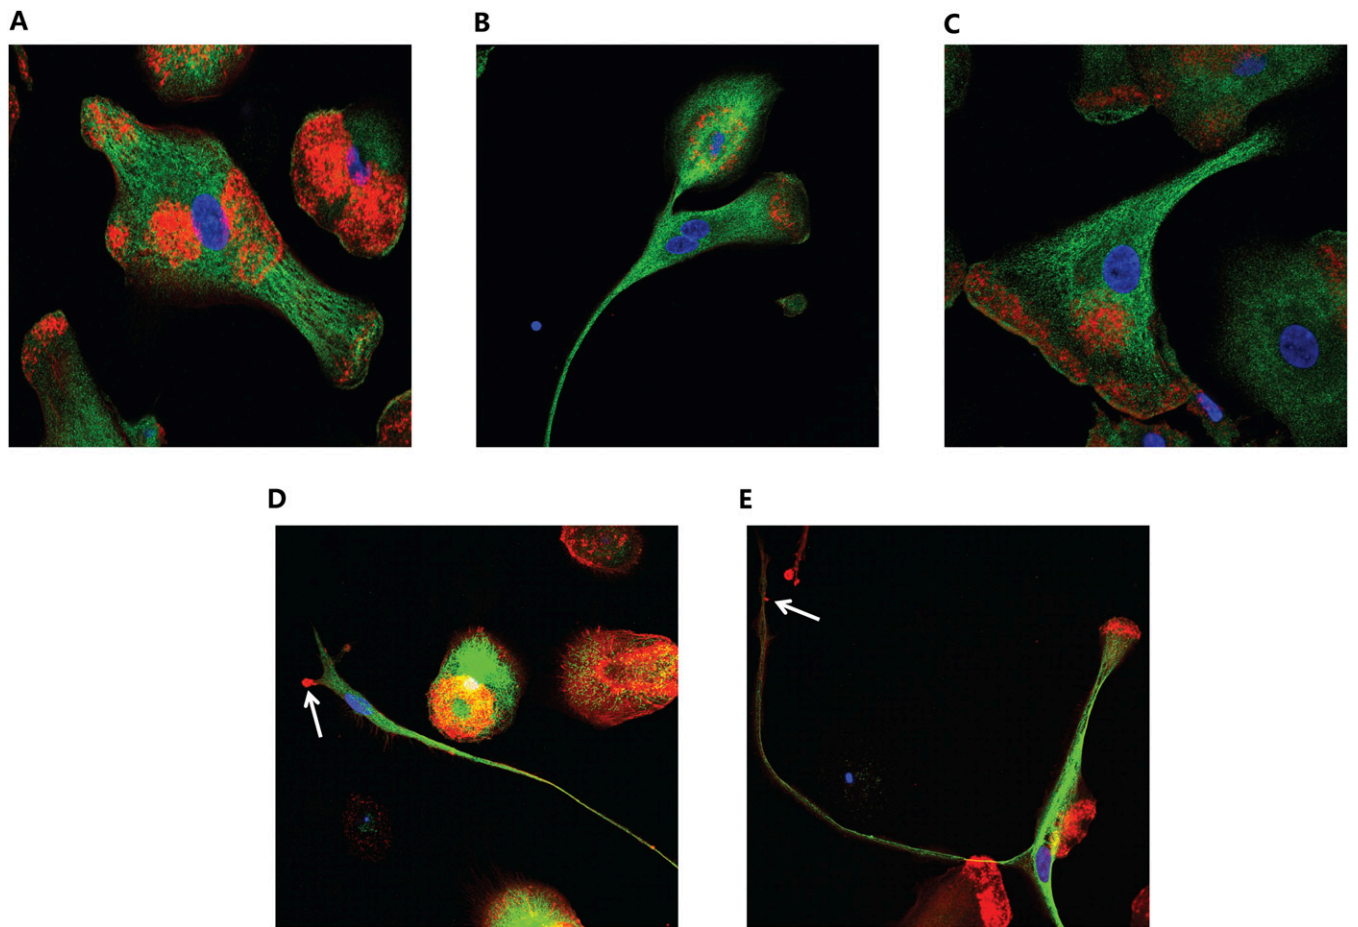

**Fig. 58.** (A–C) Nestin staining of the attached cells. Cells were cultured for 2 wk in the presence of the 3B3 antibody, fixed, and stained for Nestin (green). Actin is labeled by Phalloidin-eFluor 570 (red). (D and E). Extensive neurite length highlighted after Tuj-1 staining (green). Areas enriched for actin are red. White arrows highlight the “spine-like” bodies.

**A**

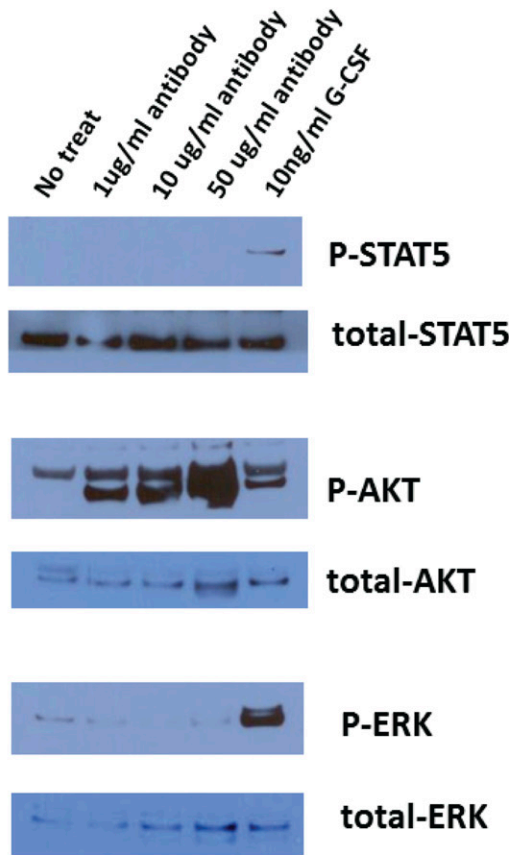

**CD34 signaling change upon treatment.**

**B**

| Symbol  | Up-Down Regulation (comparing to control group) |                  | Description                                                                                                 |
|---------|-------------------------------------------------|------------------|-------------------------------------------------------------------------------------------------------------|
|         | G-CSF treated                                   | Antibody treated |                                                                                                             |
| TNR     | -17.7987                                        | -12.9103         | Tenascin R (restrictin, janusin)                                                                            |
| NEUROG1 | 1.344                                           | -2.8421          | Neurogenin 1                                                                                                |
| PTN     | 2.1545                                          | -2.2025          | Netrin-1                                                                                                    |
| ACSL1   | 1.2054                                          | -1.7391          | Acyl-CoA:cholesterol complex homolog 1 (Drosophila)                                                         |
| DOCK    | -2.3975                                         | -1.7391          | Doublinortin                                                                                                |
| CDNF    | 20.3234                                         | -1.7391          | Craniol cell derived neurotrophic factor                                                                    |
| NEUROD1 | -2.3975                                         | -1.7391          | Neurogenesis differentiation 1                                                                              |
| NF13    | -2.3975                                         | -1.7391          | Neurogenin 3                                                                                                |
| NTN1    | 1.1248                                          | -1.2385          | Netrin 1                                                                                                    |
| HEY2    | 4.9525                                          | -1.1569          | Helary enhancer of split related with YRPW motif 2                                                          |
| BMP4    | 1.586                                           | 1.0239           | Bone morphogenetic protein 4                                                                                |
| PAK5    | 19.6514                                         | 1.1347           | Paired box 5                                                                                                |
| DRO2    | -1.248                                          | 1.2383           | Dopamine receptor D2                                                                                        |
| NOX     | 5.931                                           | 1.3017           | Neogen                                                                                                      |
| NRG1    | 1.7763                                          | 1.3452           | Neuregulin 1                                                                                                |
| BCL2    | 1.9264                                          | 1.4693           | B-cell CLL/lymphoma 2                                                                                       |
| NRG3    | 2.2133                                          | 1.6408           | Nuclear receptor subfamily 2, group E, member 3                                                             |
| SHH     | 2.3488                                          | 1.6484           | Sonic hedgehog                                                                                              |
| POLR1F  | 2.2664                                          | 1.6989           | PCP class 4 homeobox 1                                                                                      |
| ACHE    | -1.2539                                         | 2.0301           | Acetylcholinesterase                                                                                        |
| FGA4    | 3.1959                                          | 2.308            | Hyaluronidase 4                                                                                             |
| CHRM2   | 8.4601                                          | 2.3222           | Cholinergic receptor, muscarinic 2                                                                          |
| ALK     | 1.4887                                          | 2.2424           | Anaplastic lymphoma receptor tyrosine kinase                                                                |
| NRXN    | 5.7699                                          | 2.5993           | Adrenon                                                                                                     |
| PAR3    | 1.8311                                          | 2.5873           | Par-3 partitioning defective 3 homolog (C. elegans)                                                         |
| PAR6B   | 3.9234                                          | 2.575            | Bone morphogenetic protein 6b                                                                               |
| FGF     | 4.9774                                          | 2.7429           | Fibroblast growth factor 2 (basic)                                                                          |
| EP300   | 2.6375                                          | 2.9274           | E1A binding protein p300                                                                                    |
| GRIN1   | 1.1458                                          | 3.0471           | Glutamate receptor, ionotropic, N-methyl D-aspartate 1                                                      |
| DVA3    | 2.0741                                          | 3.1854           | Dihydrated, ash homolog 3 (Drosophila)                                                                      |
| CKIR1   | 3.5549                                          | 3.4989           | Cytlin-dependent kinase 5, regulatory subunit 1 (p35)                                                       |
| NEURO2  | 1.3973                                          | 3.669            | Neurogenin 2                                                                                                |
| BDNF    | 11.1987                                         | 3.0273           | Brain-derived neurotrophic factor                                                                           |
| VEGFA   | 3.1545                                          | 3.1264           | Vascular endothelial growth factor A                                                                        |
| HEY1    | 3.1789                                          | 3.1448           | Helary enhancer of split related with YRPW motif-like                                                       |
| FGF8    | 2.1744                                          | 3.4713           | Transforming growth factor, beta 1                                                                          |
| BMP2    | 2.5159                                          | 4.0274           | Bone morphogenetic protein 2                                                                                |
| HEY2    | -1.2668                                         | 4.1309           | Helary enhancer of split related with YRPW motif 1                                                          |
| CAPDH   | 3.3393                                          | 4.1463           | Glyceroldehyde-3-phosphate dehydrogenase                                                                    |
| MLL     | 4.9811                                          | 4.3751           | Mutated lymphoid or mixed-lineage leukemia (trithorax homolog, Drosophila)                                  |
| HELI1   | 5.5399                                          | 4.399            | Helary and enhancer of split 1 (Drosophila)                                                                 |
| ROBO1   | 2.9341                                          | 4.6899           | Roundabout, axon guidance receptor, homolog 1 (Drosophila)                                                  |
| DLG4    | 3.3995                                          | 4.6924           | Discs, large homolog 4 (Drosophila)                                                                         |
| PAR6B   | 2.9433                                          | 5.111            | Par-6b beta (beta) precursor protein-binding, family B, member 1 (F465)                                     |
| NF1     | 4.3342                                          | 5.4718           | Neurofibromin 1                                                                                             |
| HRP11   | 4.6123                                          | 5.6984           | Hypoxanthine phosphoribosyltransferase 1                                                                    |
| PAK1    | 4.1448                                          | 5.6948           | Paired box 3                                                                                                |
| ERBB2   | 5.6799                                          | 6.1249           | V-erb-B2 erythroblastic leukemia viral oncogene homolog 2, neurofiblastoma derived oncogene homolog (avian) |
| SOX3    | -1.8284                                         | 6.1492           | SOX3 (sex determining region Y) box 3                                                                       |
| PCP3F3  | -1.784                                          | 6.4601           | PCP class 3 homeobox 3                                                                                      |
| REPC    | 21.1181                                         | 6.1164           | Epidermal growth factor                                                                                     |
| FLNA    | 7.8053                                          | 6.8011           | Filipin enhancer factor 2C                                                                                  |
| FLNA    | 4.3488                                          | 7.5718           | Filamin A, alpha                                                                                            |
| PAR6B1  | 5.167                                           | 7.4              | Par-6b beta (beta) precursor protein-binding, family B, member 1 (F465)                                     |
| S100A6  | 4.4917                                          | 7.6963           | S100 calcium binding protein A6                                                                             |
| RHO1    | 5.3771                                          | 8.0291           | Rac1                                                                                                        |
| FLT3    | 1.9798                                          | 8.6863           | Flt3 homolog 2 (Drosophila)                                                                                 |
| EFNB1   | 5.1437                                          | 8.6989           | Egfrin-B1                                                                                                   |
| SOD1    | 6.3295                                          | 9.1233           | Superoxide dismutase 1, soluble                                                                             |
| GPI     | 9.7885                                          | 9.1892           | Glucose-6-phosphate isomerase                                                                               |
| PAK1    | 8.5541                                          | 9.0274           | Paired box 6                                                                                                |
| MYO2    | 5.9311                                          | 12.0421          | Myosin 2                                                                                                    |
| CREB1   | 10.3732                                         | 12.2892          | CREB responsive element binding protein 1                                                                   |
| ARP     | 11.1269                                         | 12.1773          | Arp2/3 beta (beta) precursor protein                                                                        |
| NRP2    | 2.2078                                          | 14.6071          | Neuropilin 2                                                                                                |
| S100B   | 2.5499                                          | 14.7818          | S100 calcium binding protein B                                                                              |
| NRK     | 29.214                                          | 15.514           | Neurite growth-promoting factor 2                                                                           |
| RPLP0   | 17.0713                                         | 16.7011          | Ribosomal protein, large, P0                                                                                |
| RAC1    | 8.9338                                          | 16.8001          | Ras-related C3 botulinum toxin substrate 1 (rho family, small GTP binding protein Rac1)                     |
| STAT3   | 12.4851                                         | 17.2221          | Signal transducer and activator of transcription 3 (acute-phase response factor)                            |
| SOX1    | 6.8929                                          | 17.3976          | SOX (sex determining region Y) box 2                                                                        |
| CKCL1   | 6.9272                                          | 18.31            | Cem6-like (C-6C motif) ligand 1 (metastoma growth stimulating activity, alpha)                              |
| CKIRAP2 | 4.1843                                          | 18.004           | CKIR3 regulatory subunit associated protein 2                                                               |
| ADORA2A | 11.1094                                         | 20.1573          | Adenosine A2a receptor                                                                                      |
| B2M     | 14.186                                          | 20.6518          | Beta-2-microglobulin                                                                                        |
| ACTB    | 16.1094                                         | 24.9336          | Actin, beta                                                                                                 |
| PCLO2   | 3.308                                           | 24.3751          | Oligodendrocyte lineage transcription factor 2                                                              |
| IL3     | 5.3152                                          | 30.1039          | Interleukin 3 (colony-stimulating factor, multiple)                                                         |
| RTN4    | 17.8168                                         | 33.881           | Relican 4                                                                                                   |
| NDN     | 16.5192                                         | 33.6451          | Neclin homolog (mouse)                                                                                      |
| NRP1    | 6.0134                                          | 34.2299          | Neuropilin 1                                                                                                |
| DOCK1   | 41.799                                          | 36.0595          | Dock, ood O2/m-homolog 1 (Drosophila)                                                                       |
| DLL1    | 3.3423                                          | 43.2457          | Delta-like 1 (Drosophila)                                                                                   |
| TH      | 22.2178                                         | 47.2974          | Tyrosine hydroxylase                                                                                        |
| MMP2    | 52.128                                          | 55.5154          | Matrix metallo-associated protein 2                                                                         |
| APDE    | -1.285                                          | 57.7622          | Apoptogen E                                                                                                 |
| NRCAM   | -2.195                                          | 66.8107          | Neuronal cell adhesion molecule                                                                             |
| NRP     | 3.1484                                          | 229.5542         | Neurite disease (neuropiloma)                                                                               |
| ADORA1  | 8.8274                                          | 314.938          | Adenosine A1 receptor                                                                                       |

**Fig. S9.** (A) G-CSFR downstream signaling differs depending on the activators. CD34+ cells were treated with either the agonist antibody or G-CSF and the lysates were analyzed by Western blots using phosphorylation specific antibodies. (B) Quantitative PCR (qPCR)-based array analysis of the expression of 84 neurogenesis-related genes. The gene expression in control untreated CD34+ bone marrow cells was compared with either G-CSF or antibody treated cells after 2 wk in culture. All cells were from the same harvest and were simply divided into three parts. After culture, the RNA was extracted and cDNA was prepared. The cDNA was added to an array of 84 wells, each of which contained a different set of PCR primers for a gene related to neurogenesis. qPCR was carried out on the BioRad CFX-96 machine, and the data were analyzed by a web-based tool on [SABioscience.com](http://SABioscience.com). An equal threshold was set to allow accurate comparison across samples, and the data were normalized to wells having the least variation according to the manufacturer's instructions.
